# Supplementary material for: Queuine Salvaging in the Human Parasite Entamoeba histolytica
Source: MDPI journal article supplement (doi:10.3390/cells11162509), 2022-08-12
Supplement: s1 [file s1]

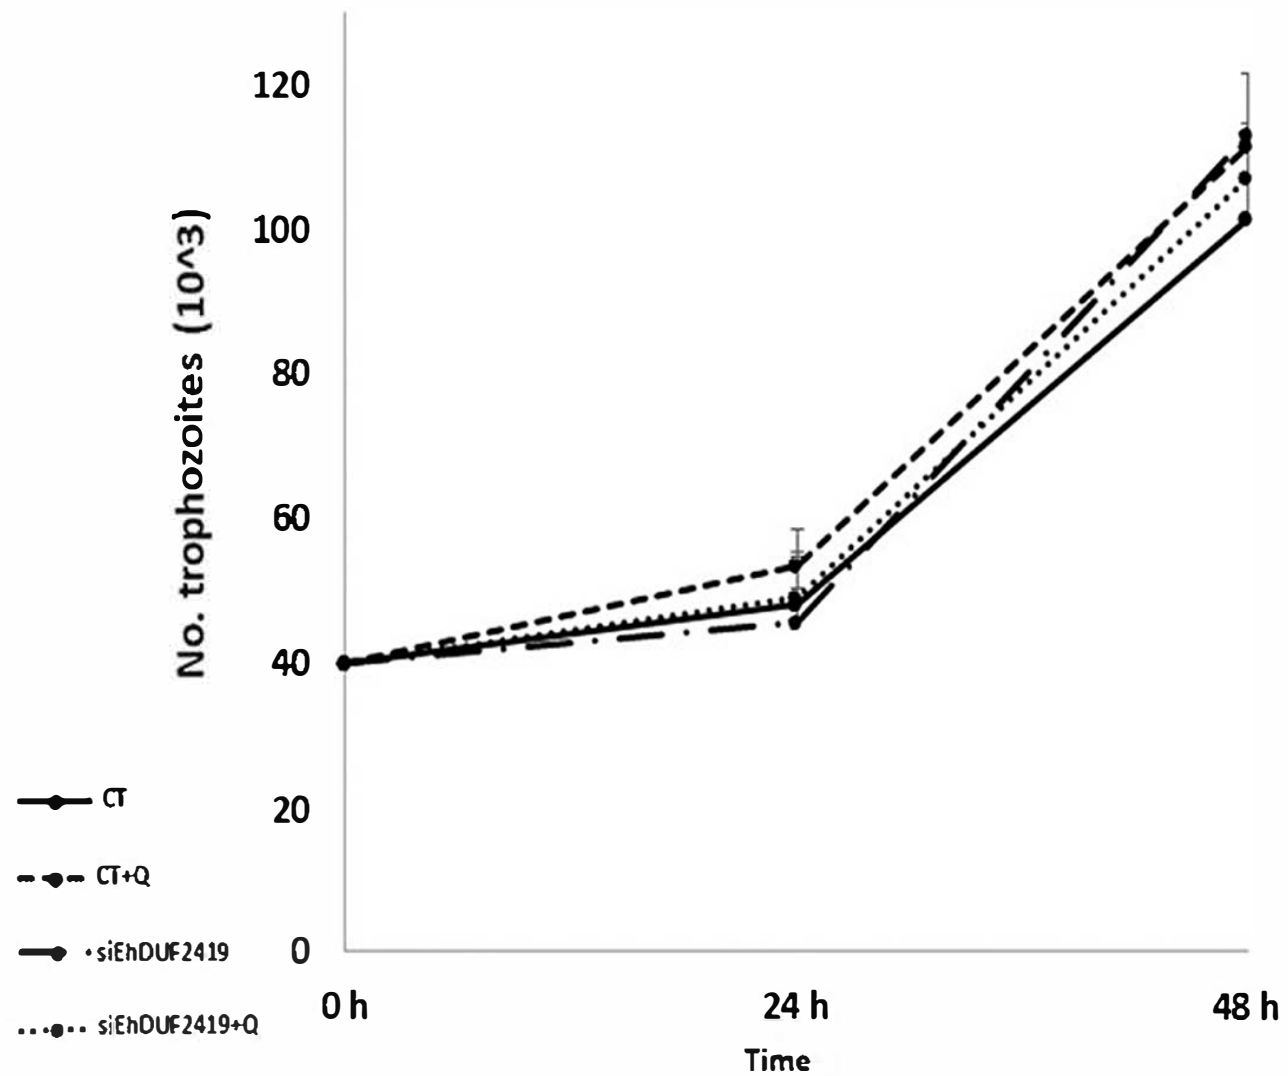

**Supplementary Figure S1. Growth rate of *E. histolytica* siEhDUF2419 trophozoites.**

40\*10<sup>3</sup> control trophozoites and siEhDUF2419 trophozoites were grown for 24 hours or 48 hours in 15-mL tube with/without 0.1μM queuosine. The number of viable trophozoites was determined by eosin dye exclusion. The data represent two independent experiment that were repeated twice. p-value > 0.05 by an unpaired Student *t* test.
